## No Correlation of Pancreatic Fat and $\beta$ -Cell Function in Young Women With and Without a History of Gestational Diabetes

Daniel Popp,<sup>1</sup> Stephanie Aertsen,<sup>2,3,4</sup> Charlotte Luetke-Daldrup,<sup>1</sup> Eva Coppenrath,<sup>1</sup> Holger Hetterich,<sup>1</sup> Tobias Saam,<sup>1</sup> Marietta Rottenkolber,<sup>2,3,4</sup> Jochen Seissler,<sup>2,3,4</sup> Andreas Lechner,<sup>2,3,4\*</sup> and Nora N. Sommer<sup>1\*</sup>

<sup>1</sup>Klinik und Poliklinik für Radiologie, Ludwig Maximilians University Hospital, 80336 Munich, Germany; <sup>2</sup>Diabetes Research Group, Medizinische Klinik und Poliklinik IV, Ludwig Maximilians University Hospital, 80336 Munich, Germany; <sup>3</sup>Clinical Cooperation Group Type 2 Diabetes, Helmholtz Zentrum München, 85764 Neuherberg, Germany; and <sup>4</sup>Deutsches Zentrum für Diabetesforschung, 85764 Neuherberg, Germany

**Context:** Pancreatic steatosis may contribute to  $\beta$ -cell dysfunction in type 2 diabetes (T2D), but data are controversial. Women who had gestational diabetes mellitus (GDM) are at high risk for developing T2D.

**Objective:** To examine the association of pancreatic fat content with early/first-phase insulin secretion (as markers of  $\beta$ -cell function).

**Design:** Cross-sectional analysis of a subcohort of the monocentric, prospective cohort study titled Prediction, Prevention, and Subclassification of Type 2 Diabetes.

**Setting:** Ludwig Maximilians University Hospital, Munich, Germany.

**Participants:** Ninety-seven women, 3 to 16 months after pregnancy [41 normoglycemic women post-GDM, 19 women post-GDM with pathological glucose metabolism, and 37 normoglycemic women after a normoglycemic pregnancy (controls)].

**Main Outcome Measures:** Correlation of MRI-measured pancreatic fat content with early insulin release in an oral glucose tolerance test (OGTT) [insulin increment within the first 30 minutes of the OGTT (IR30)] and first-phase insulin response (FPIR) in an intravenous glucose tolerance test ( $n = 65$ ), both adjusted for insulin sensitivity index (ISI).

**Results:** Pancreatic fat content did not correlate with IR30 and FPIR adjusted for ISI. It correlated positively with body mass index, waist circumference, liver fat, and intraabdominal fat volume.

**Conclusion:** Pancreatic fat content does not correlate with  $\beta$ -cell function in a cohort of young women with different degrees of T2D risk. (*J Clin Endocrinol Metab* 103: 3260–3266, 2018)

In combination with a progressive decrease in  $\beta$ -cell function (1), insulin resistance characterizes type 2 diabetes (T2D). Sharing pathophysiologic mechanisms with T2D (2), gestational diabetes mellitus

(GDM) is a transient disturbance of glucose metabolism during pregnancy. Consequently, GDM indicates a high risk of subsequent, permanent T2D. Twenty or more percent of women with GDM

ISSN Print 0021-972X ISSN Online 1945-7197  
Printed in USA

Copyright © 2018 Endocrine Society  
Received 23 January 2018. Accepted 21 June 2018.  
First Published Online 26 June 2018

\*These authors contributed equally to this study and share last authorship.  
Abbreviations: BMI, body mass index; DI, disposition index; FPIR, first-phase insulin response; GDM, gestational diabetes mellitus; IR30, insulin increment within the first 30 minutes of the oral glucose tolerance test; ISI, insulin sensitivity index; ivDI, intravenous disposition index; ivGTT, intravenous glucose tolerance test; MRS, magnetic resonance spectroscopy; NGT, normal glucose tolerance; OGTT, oral glucose tolerance test; pGDM, post-gestational diabetes mellitus; PGT, pathological glucose tolerance; PPS-Diab study, Prediction, Prevention, and Subclassification of Type 2 Diabetes study; ROI, region of interest; T2D, type 2 diabetes.

develop overt T2D within 10 years after the index pregnancy (3).

The hallmark of  $\beta$ -cell dysfunction in T2D is reduced first-phase insulin secretion (4). Various factors have been implicated in the development of this dysfunction, in particular genetic risk, increased age, obesity, physical inactivity, glucotoxicity, and lipotoxicity (5). The last factor, lipotoxicity, has been linked to intrapancreatic fat deposition (6). Nonadipose tissues, such as liver, skeletal muscle, heart, and also the pancreas, can accumulate triglycerides and other lipids, a process seen in many obese individuals (6). This intraorgan fat contributes to insulin resistance, particularly of the liver, and can lead to organ inflammation and damage, exemplified by nonalcoholic fatty liver disease (7).

The role of pancreatic lipid accumulation in the development of  $\beta$ -cell dysfunction continues to be debated. In Zucker diabetic fatty rats, triglyceride overload in the pancreatic islets fosters hyperglycemia and  $\beta$ -cell loss (8). In humans, pancreatic fat content correlates negatively with  $\beta$ -cell function in several cohorts (9–11), and fat deposition in the pancreas was associated with diabetes (12–15) and prediabetes (14) in some studies. However, others have found neither a negative correlation of pancreatic fat content with  $\beta$ -cell function (10, 16–18) nor the association of pancreatic fat with glycemic state (19, 20).

These divergent findings may in part be the result of difficulties to accurately quantify intrapancreatic fat. The pancreas is not generally accessible to biopsy and the standard noninvasive imaging techniques (abdominal ultrasonography, computed tomography, and routine MRI) lack sensitivity and accuracy (21). Single-voxel ( $^1\text{H}$ ) magnetic resonance spectroscopy (MRS) has been used as an alternative in most human studies to date, but it is susceptible to errors due to the small size of the organ and its surrounding fat tissue. Breathing artifacts can be a particular problem with this technique (21). Newer techniques, such as modified Dixon-based MRI, offer significant advantages over MRS: shorter acquisition and postprocessing times, as well as no need of high-level operator expertise in voxel placement. These methods are also sufficiently sensitive and avoid motion artifacts by a single breath-hold technique and manual segmentation (15, 22, 23).

In this study, we applied a modified two-point Dixon MRI technique to quantify pancreatic fat content in a cohort of young women after a recent pregnancy with and without gestational diabetes. We examined whether pancreatic fat correlated with early/first-phase insulin release as markers of adequate  $\beta$ -cell function.

## Materials and Methods

### Study design

This study was performed as a cross-sectional analysis in the course of the prospective, monocenter observational study titled Prediction, Prevention, and Subclassification of Type 2 Diabetes (PPS-Diab) (24). The study population consisted of women 3 to 16 months after a pregnancy complicated by GDM [post-GDM (pGDM)] or after a normoglycemic pregnancy (control subjects) at a ratio of  $\sim 2:1$ . The participants were recruited consecutively at the Diabetes Center and the obstetrics department of the University Hospital (Klinikum der Universitaet Muenchen) in Munich, Germany. All participants provided written informed consent and the study protocol was approved by the Ethics Committee of the Ludwig Maximilians University (Munich, Germany).

### Participants

The diagnosis of GDM was based on a 75-g oral glucose tolerance test (OGTT) during pregnancy. The cutoff values for GDM were 92/180/153 mg/dL plasma glucose following the International Association of the Diabetes and Pregnancy Study recommendations (25). Women could participate as control subjects when they had no history of GDM in any previous pregnancy and either a normal 75-g OGTT or a normal 50-g screening OGTT ( $<135$  mg/dL plasma glucose,  $n = 3$ ) after the 23rd week of gestation. All data used in this analysis were collected at the baseline visit of the PPS-Diab study that occurred 3 to 16 months after the index pregnancy. A postpartum visit with a 75-g OGTT is recommended for all women with GDM in Germany.

### Anthropometrical and clinical measurements

Anthropometrics, clinical, and clinical chemistry data were obtained as described previously (24). We used the definitions of the American Diabetes Association (26) to distinguish between participants with normal glucose tolerance (NGT) and those with pathological glucose tolerance (PGT); that is, impaired fasting glucose, impaired glucose tolerance, or newly diagnosed T2D (during the study visit).

### Fat fraction measurements with MRI

In addition to the basic examination, all study participants were invited for a whole-body MRI study (3 Tesla system, Ingenia or Achieva; Philips Health Care, Best, Netherlands). Liver and pancreatic fat content were derived from fat-fraction maps based on fat/water images of a single breath-hold modified two-point Dixon sequence (repetition time 4.1 ms, first echo time 1.5 ms, second echo time 2.7 ms, flip angle  $5^\circ$ , slice thickness 5 mm,  $184 \times 170$  matrix,  $320 \times 300 \times 200$  field of view, breath-hold time  $\sim 12$  seconds). In the pancreas, three regions of interest (ROIs) with sizes of  $\sim 70$  to  $90$  mm<sup>2</sup> each were placed in each of the three anatomic parts of the organ, that is, caput, corpus, and cauda, so that a total number of nine measurements resulted. Care was taken to avoid the surrounding visceral fat, greater regions of intrapancreatic adipose tissue infiltration, as well as visible vascular and ductal structures. Medians and means for the whole pancreas were calculated. ROIs with sizes of  $\sim 120$  to  $150$  mm<sup>2</sup> each were placed in three different sites of segment VII in the right liver lobe, avoiding visible vascular structures, and the median was calculated. Three-dimensional mDixon whole-body sequences were obtained and postprocessed with the software SliceOmatic 4.3 rev. 11 (TomoVision, Magog,

QC, Canada) to quantify subcutaneous and visceral adipose tissue volume as described in more detail previously (24)].

### OGTT

All study subjects received a 75-g OGTT. The Matsuda insulin sensitivity index (ISI) was calculated as described previously (27) and validated against hyperinsulinemic/euglycemic clamps (24) in a subgroup of participants. The insulin increment within the first 30 minutes of the OGTT (IR30) was used as an approximation of first-phase insulin secretion in the OGTT. This was previously validated with intravenous glucose tolerance tests (IVGTTs) in a subgroup of study participants and yielded a better correlation than the insulinogenic index (24). The disposition index (DI) was calculated as  $IR30 \times ISI$  (28).

### IVGTT

We invited all participants to also return for an IVGTT on a separate day. This was executed as described previously (24). First-phase insulin response (FPIR) was calculated as the incremental area under the insulin curve during the first 10 minutes after glucose injection. An intravenous DI (ivDI) was calculated as  $FPIR \times ISI$ .

### Statistical analyses

The primary outcome measures were the correlations of pancreatic fat content with early insulin release in an OGTT (IR30) and first-phase insulin response in an IVGTT (FPIR;  $n = 65$ ), both adjusted for ISI.

All metric and normally distributed variables are reported as mean  $\pm$  SD; nonnormally distributed variables are reported as median (first quartile to third quartile), and categorical variables are reported as frequency (percentage). To compare groups, the Kruskal–Wallis test and a Dunn *post hoc* test were used for metric variables and the  $\chi^2$  or Fisher exact test was used for categorical variables.  $P$  values of  $<0.05$  were considered statistically significant. Spearman correlation coefficients ( $\rho$ ) and partial correlation coefficients were calculated for the correlation analyses. All statistical calculations were performed using SAS (version 9.3; SAS Institute) or R (version 3.1.3; [www.R-project.org](http://www.R-project.org)).

## Results

### Baseline characteristics

Complete pancreatic fat measurements were obtained from 102 women. We excluded five participants, two because of a diagnosis of type 1 diabetes, one because of overt hyperthyroidism at the time of the study visit, and two because of an abnormal OGTT at the study visit despite a history of a normoglycemic pregnancy. The final cohort consisted of 97 women, 41 normoglycemic women pGDM (pGDM/NGT), 19 women pGDM with pathological glucose metabolism (pGDM/PGT), and 37 normoglycemic women after a normoglycemic pregnancy (controls). The mean age was  $35.5 \pm 4$  years and subjects were examined at an average of  $9.6 \pm 2.9$  months after delivery. Compared with controls, women pGDM/PGT had a higher body mass index (BMI), waist circumference, systolic blood pressure, high-sensitive C-reactive protein,

$\gamma$ -glutamyltransferase, and triglycerides, as well as a lower high-density lipoprotein cholesterol, ISI, DI, and ivDI. pGDM/NGT had higher systolic blood pressure, 2-hour plasma glucose, and lower ISI, DI, and ivDI than did controls. All baseline characteristics are shown in Table 1.

### Pancreatic fat content in the different groups of study participants

We measured pancreatic fat content in nine ROIs covering the whole organ (Fig. 1; Supplemental Fig. 1). Median pancreatic fat content ranged from 0% to 23.7% and was not significantly different between the three groups of women (Table 1). One woman had a pancreatic fat content that was considerably higher than that of the rest of the cohort. This woman had no history of pancreatic disease, normal serum lipase, and no abnormalities of the pancreas in noncontrast MRI. We therefore left this case in our main analyses but also repeated these after excluding this woman (Supplemental Tables 1 and 2). This did not change any of our results significantly.

### Correlations of pancreatic fat with insulin release, insulin sensitivity, and other fat compartment parameters

Median pancreatic fat content did not correlate with IR30 from the OGTT ( $\rho = 0.09$ ;  $P = 0.47$ ) and FPIR from the IVGTT ( $\rho = 0.17$ ;  $P = 0.17$ ), both adjusted for ISI (Fig. 2; Table 2; unadjusted results also in Supplemental Fig. 2). Additionally, median pancreatic fat did not correlate with DI and ivDI. However, it correlated positively with BMI, waist circumference, liver fat content, and intraabdominal fat volume (Fig. 2; Table 2). Median pancreatic fat correlated inversely with ISI, but this correlation was lost after adjustment for BMI (Table 2). The results were similar when we used mean or minimum pancreatic fat content instead of the median (Supplemental Table 2).

## Discussion

We examined pancreatic fat content in young women with different degrees of T2D risk. Our primary finding was that pancreatic fat content did not correlate with  $\beta$ -cell function. However, pancreatic fat content correlated positively with BMI as well as visceral and hepatic fat content.

To our knowledge, pancreatic fat content has not been examined previously in young women with and without recent GDM. It has been studied in individuals with prediabetes (impaired fasting glucose and/or IGT) and T2D. Most of these studies agree that pancreatic fat is higher in prediabetes and T2D compared with healthy control subjects (10, 12, 15, 16, 18, 20, 29, 30). However, this does not seem to be a specific feature of the pancreas

**Table 1. Baseline Characteristics**

|                                                | Total               | Control             | pGDM/NGT            | pGDM/PGT            | P Value | Post Hoc Test                  |
|------------------------------------------------|---------------------|---------------------|---------------------|---------------------|---------|--------------------------------|
| Clinical characteristics                       |                     |                     |                     |                     |         |                                |
| N                                              | 97                  | 37                  | 41                  | 19                  |         |                                |
| Age, y (mean ± SD)                             | 35.5 ± 3.9          | 35.9 ± 4.1          | 35.0 ± 3.3          | 35.7 ± 4.5          | 0.5383  | —                              |
| Time since delivery, mo (mean ± SD)            | 9.6 ± 2.9           | 9.3 ± 2.6           | 9.8 ± 3.1           | 9.9 ± 3.0           | 0.7855  | —                              |
| BMI, kg/m <sup>2</sup> (mean ± SD)             | 24.9 ± 5.2          | 22.8 ± 3.3          | 24.8 ± 4.6          | 29.0 ± 6.8          | 0.0015  | Control vs PGT                 |
| BMI <25                                        | 60 (61.9%)          | 27 (73.0%)          | 27 (65.9%)          | 6 (31.6%)           | 0.0061  |                                |
| BMI ≥25 to <30                                 | 19 (19.6%)          | 8 (21.6%)           | 6 (14.6%)           | 5 (26.3%)           |         |                                |
| BMI ≥30                                        | 18 (18.6%)          | 2 (5.4%)            | 8 (19.5%)           | 8 (42.1%)           |         |                                |
| Waist circumference, cm (mean ± SD)            | 80.2 ± 11.1         | 76.3 ± 9.0          | 80.0 ± 11.2         | 88.3 ± 11.0         | 0.0007  | Control vs PGT, NGT vs PGT     |
| Systolic blood pressure, mm Hg (mean ± SD)     | 115.7 ± 10.3        | 111.5 ± 10.0        | 117.4 ± 9.3         | 120.1 ± 10.6        | 0.0013  | Control vs PGT, NGT vs control |
| Diastolic blood pressure, mm Hg (mean ± SD)    | 72.1 ± 9.1          | 69.0 ± 8.2          | 73.1 ± 7.3          | 76.1 ± 12.3         | 0.0151  | No                             |
| IFG, n (%)                                     | 8 (8.3)             | —                   | —                   | 8 (42.1)            | —       |                                |
| IGT, n (%)                                     | 7 (7.2)             | —                   | —                   | 7 (36.8)            |         |                                |
| IFG + IGT, n (%)                               | 1 (1.0)             | —                   | —                   | 1 (5.3)             |         |                                |
| T2D, n (%)                                     | 3 (3.1)             | —                   | —                   | 3 (15.8)            |         |                                |
| MRI                                            |                     |                     |                     |                     |         |                                |
| Pancreatic fat, % [median (Q1–Q3)]             | 2.7 (1.8–4.8)       | 2.2 (1.9–3.4)       | 3.2 (1.7–5.6)       | 2.8 (1.9–6.9)       | 0.0983  | —                              |
| Liver fat, % [median (Q1–Q3)]                  | 0.5 (0.03–1.3)      | 0.2 (0.0–0.5)       | 0.5 (0.1–1.3)       | 2.1 (0.3–5.3)       | 0.0010  | Control vs PGT                 |
| Intraabdominal fat, L [median (Q1–Q3)]         | 1.6 (1.1–2.7)       | 1.3 (0.8–1.9)       | 1.7 (1.1–2.8)       | 2.5 (1.3–3.3)       | 0.0091  | Control vs PGT                 |
| Clinical chemistry                             |                     |                     |                     |                     |         |                                |
| Triglycerides, mg/dL [median (Q1–Q3)]          | 64.0 (53.0–91.0)    | 59.0 (52.0–75.0)    | 66.0 (49.0–92.0)    | 95.0 (64.0–130.0)   | 0.0061  | Control vs PGT, NGT vs PGT     |
| LDL cholesterol, mg/dL [median (Q1–Q3)]        | 104.0 (88.0–119.0)  | 104.0 (85.0–116.0)  | 103.0 (89.0–120.0)  | 112.0 (88.0–126.0)  | 0.6285  | —                              |
| HDL cholesterol, mg/dL [median (Q1–Q3)]        | 61.0 (50.0–73.0)    | 64.0 (58.0–75.0)    | 64.0 (49.0–73.0)    | 49.0 (42.0–59.0)    | 0.0006  | Control vs PGT, NGT vs PGT     |
| hsCRP [median (Q1–Q3)]                         | 0.0 (0.0–0.1)       | 0.0 (0.0–0.1)       | 0.0 (0.0–0.1)       | 0.1 (0.0–0.3)       | 0.0018  | Control vs PGT                 |
| γ-Glutamyltransferase, U/L [median (Q1–Q3)]    | 14.0 (11.0–20.0)    | 13.0 (10.0–17.0)    | 14.0 (11.0–18.0)    | 22.0 (15.0–29.0)    | <0.0001 | Control vs PGT, NGT vs PGT     |
| OGTT                                           |                     |                     |                     |                     |         |                                |
| Fasting plasma glucose, mg/dL [median (Q1–Q3)] | 91.0 (88.0–96.0)    | 90.0 (84.0–92.0)    | 91.0 (88.0–94.0)    | 103.0 (97.0–107.0)  | <0.0001 | Control vs PGT, NGT vs PGT     |
| Plasma glucose (2 h), mg/dL [median (Q1–Q3)]   | 104.0 (87.0–121.0)  | 87.0 (78.0–108.0)   | 109.0 (100.0–121.0) | 146.0 (113.0–169.0) | <0.0001 | All                            |
| ISI [median (Q1–Q3)]                           | 5.5 (3.6–8.1)       | 7.8 (5.5–9.5)       | 5.4 (4.0–7.5)       | 3.0 (2.3–4.0)       | <0.0001 | All                            |
| IR30 [median (Q1–Q3)]                          | 40.8 (30.7–58.3)    | 40.2 (31.7–61.8)    | 41.1 (28.7–56.4)    | 40.8 (33.4–60.0)    | 0.8272  | —                              |
| DI [median (Q1–Q3)]                            | 232.7 (162.5–321.7) | 321.7 (250.6–392.0) | 194.4 (163.7–294.4) | 129.5 (100.5–173.4) | <0.0001 | All                            |
| IVGTT                                          |                     |                     |                     |                     |         |                                |
| FPIR [median (Q1–Q3)] (n = 65)                 | 2.1 (1.3–3.2)       | 2.1 (1.2–2.8)       | 1.9 (1.3–2.9)       | 2.2 (1.4–3.4)       | 0.7590  | —                              |
| ivDI [median (Q1–Q3)] (n = 65)                 | 11.1 (8.0–18.3)     | 16.8 (11.1–22.9)    | 9.9 (8.7–15.3)      | 6.7 (5.8–10.2)      | <0.0001 | All                            |

Abbreviations: IFG, impaired fasting glucose; LDL, low-density lipoprotein; HDL, high-density lipoprotein.

but is linked to high liver fat content and visceral adiposity in general (11, 17, 20, 22, 31). In our study, intraabdominal fat and liver fat content were also correlated with pancreatic fat and were highest in the women pGDM/PGT, reflecting this group's overall metabolic risk.

Early insulin release in the OGTT and first-phase insulin release in the IVGTT (both with adjustment for insulin sensitivity), as well as the DI, are generally used to quantify  $\beta$ -cell function in human studies. However, none of these parameters correlated negatively with pancreatic fat content in our study.

This finding contrasts with several *in vitro* and animal experiments that provide a potential pathophysiologic

background by which pancreatic lipids could impair  $\beta$ -cell function (8, 32–34). However, preclinical models of the phenomenon are often artificial, for example, because of very high pancreatic fat content and free fatty acid level. Early human studies also found a negative association between pancreatic fat and  $\beta$ -cell function (9–11), but more recent work, similar to our study, could not confirm these findings (10, 16–18) (Table 2). Uncorrected insulin secretion is often even increased with higher pancreatic fat (16, 17), likely as a result of compensation for the insulin resistance associated with ectopic fat.

Based on our experience during this study, we became skeptical of results based on an MRS of the pancreas. This

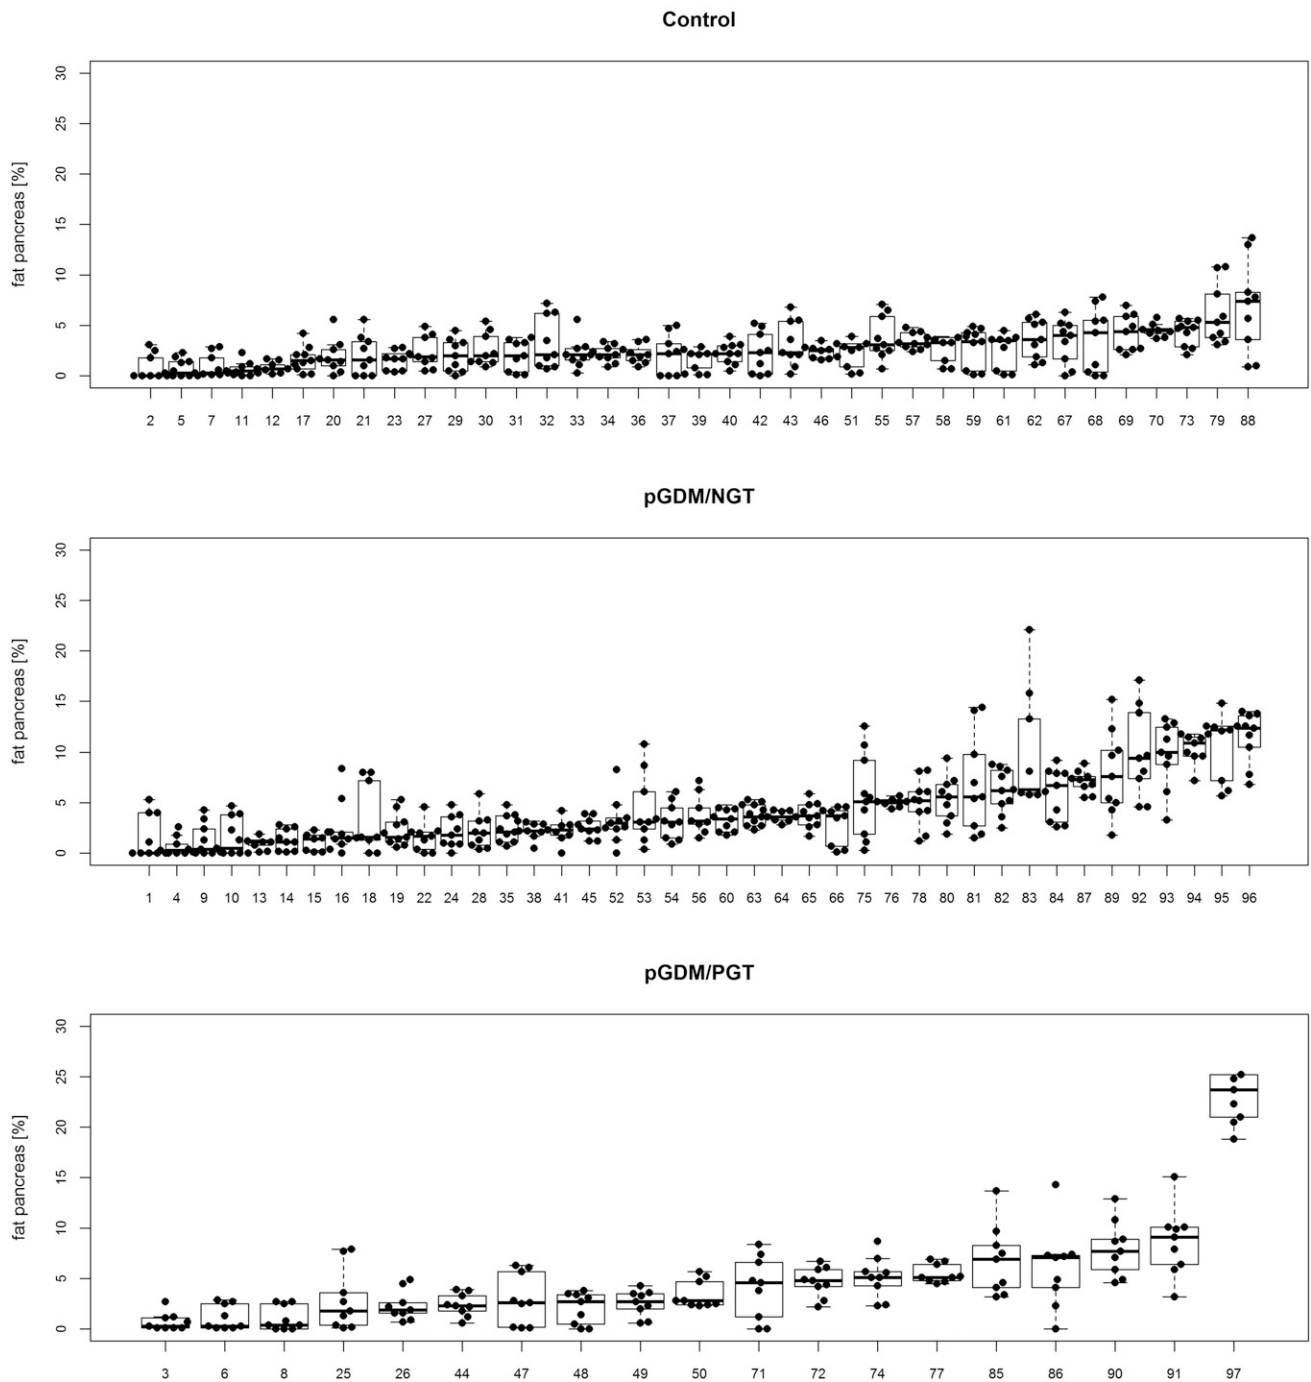

**Figure 1.** Pancreatic fat content of all study participants, sorted by group and, second, by median pancreatic fat content. Nine ROIs per participant (dots), including median and distribution, are shown. Numbers indicate rank of median pancreatic fat content in the whole cohort.

technique requires voxel placement based on a previous image and “blind” data acquisition. With the pancreas being small, often surrounded by adipose tissue, and mobile with respiration despite its retroperitoneal location, we found this method to be unreliable (data not shown). MRI fat fraction maps provided a better alternative and should be considered the current standard of reference.

One limitation of our study is that we were unable to discriminate between fat stored in infiltrating adipocytes

or exocrine or endocrine pancreatic cells, because the measurement simply represented the mean fat content in the ROI. We therefore may have missed effects of different fat distributions among the various cell types, in particular intraislet lipotoxicity. Another limitation of the study is its cross-sectional design, which precludes the study of causal relationships. Although the sample size of our study was large for a cohort with detailed pancreatic fat measurements, it remains small from a biostatistics perspective. This may have limited our ability to detect

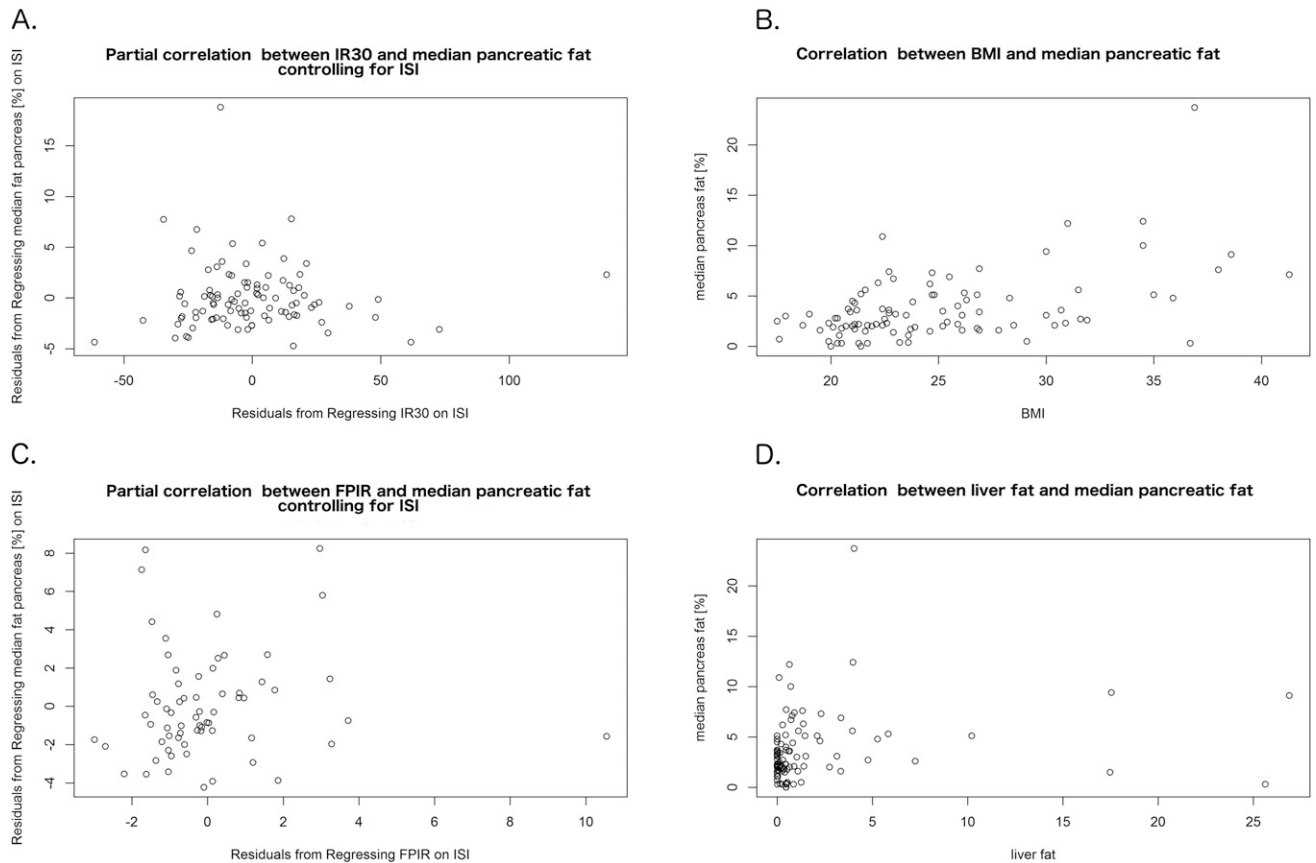

**Figure 2.** Correlations of pancreatic fat with main outcome measures and adiposity markers. We observed no correlation of median pancreatic fat content with (A) IR30 from the OGTT and (C) FPIR from the IVGTT, both adjusted for ISI. Significant positive correlations were seen between median pancreatic fat and markers of general and visceral adiposity, illustrated here by (B) BMI and (D) liver fat content.

additional differences in the cohort. We also cannot exclude that our findings may have been different without a preceding pregnancy.

Particular strengths of our work are its deeply phenotyped cohort homogeneous for age and sex but including individuals with different degrees of T2D risk, and a detailed measurement of the fat content in all anatomic regions of the pancreas.

**Table 2. (Partial) Spearman Correlation Coefficients With Median Pancreatic Fat Content**

|                         |                           |
|-------------------------|---------------------------|
| IR30                    | 0.16 (0.110)              |
| IR30 adjusted for ISI   | 0.09 (0.471)              |
| FPIR                    | 0.24 (0.052)              |
| FPIR adjusted for ISI   | 0.17 (0.172)              |
| DI                      | −0.18 (0.082)             |
| ivDI                    | 0.04 (0.728)              |
| BMI                     | 0.41 ( <b>&lt;0.001</b> ) |
| Waist circumference, cm | 0.29 ( <b>0.004</b> )     |
| Liver fat, %            | 0.28 ( <b>0.006</b> )     |
| Intraabdominal fat, L   | 0.38 ( <b>&lt;0.001</b> ) |
| ISI                     | −0.27 ( <b>0.008</b> )    |
| ISI adjusted for BMI    | 0.01 (0.903)              |

*P* values are shown in parentheses; when <0.05 they were considered statistically significant and are shown in bold.

We conclude that, in the population we studied, high pancreatic fat is not linked to impaired  $\beta$ -cell function.

## Acknowledgments

We are thankful to all participants of the PPS-Diab study and to the diabetes care team of the Medizinische Klinik 4. We also thank Vanessa Sacco, Carmen Wichmann, and Mandy Meisel for expert technical assistance.

**Financial Support:** This work was supported by the Helmholtz Zentrum München, Klinikum der Universität München, and the German Center for Diabetes Research.

**Correspondence and Reprint Requests:** Andreas Lechner, MD, Diabetes Research Group, Medizinische Klinik und Poliklinik 4, Ziemssenstrasse 1, 80336 Munich, Germany. E-mail: [andreas.lechner@med.uni-muenchen.de](mailto:andreas.lechner@med.uni-muenchen.de).

**Disclosure Summary:** The authors have nothing to disclose.

## References

1. Fonseca VA. Defining and characterizing the progression of type 2 diabetes. *Diabetes Care*. 2009;32(Suppl 2):S151–S156.
2. Kautzky-Willer A, Prager R, Waldhäusl W, Pacini G, Thomasset K, Wagner OF, Ulm M, Strelci C, Ludvik B. Pronounced insulin resistance and inadequate  $\beta$ -cell secretion characterize lean

- gestational diabetes during and after pregnancy. *Diabetes Care*. 1997;20(11):1717–1723.
3. Feig DS, Zinman B, Wang X, Hux JE. Risk of development of diabetes mellitus after diagnosis of gestational diabetes. *CMAJ*. 2008;179(3):229–234.
  4. Weyer C, Bogardus C, Mott DM, Pratley RE. The natural history of insulin secretory dysfunction and insulin resistance in the pathogenesis of type 2 diabetes mellitus. *J Clin Invest*. 1999;104(6):787–794.
  5. Cornell S. Continual evolution of type 2 diabetes: an update on pathophysiology and emerging treatment options. *Ther Clin Risk Manag*. 2015;11:621–632.
  6. van Raalte DH, van der Zijl NJ, Diamant M. Pancreatic steatosis in humans: cause or marker of lipotoxicity? *Curr Opin Clin Nutr Metab Care*. 2010;13(4):478–485.
  7. Szendroedi J, Roden M. Ectopic lipids and organ function. *Curr Opin Lipidol*. 2009;20(1):50–56.
  8. Lee Y, Hirose H, Ohneda M, Johnson JH, McGarry JD, Unger RH. Beta-cell lipotoxicity in the pathogenesis of non-insulin-dependent diabetes mellitus of obese rats: impairment in adipocyte-beta-cell relationships. *Proc Natl Acad Sci USA*. 1994;91(23):10878–10882.
  9. Szczepaniak LS, Victor RG, Mathur R, Nelson MD, Szczepaniak EW, Tyer N, Chen I, Unger RH, Bergman RN, Lingvay I. Pancreatic steatosis and its relationship to  $\beta$ -cell dysfunction in humans: racial and ethnic variations. *Diabetes Care*. 2012;35(11):2377–2383.
  10. Tushuizen ME, Bunck MC, Pouwels PJ, Bontemps S, van Waesberghe JHT, Schindhelm RK, Mari A, Heine RJ, Diamant M. Pancreatic fat content and  $\beta$ -cell function in men with and without type 2 diabetes. *Diabetes Care*. 2007;30(11):2916–2921.
  11. Heni M, Machann J, Staiger H, Schwenzer NF, Peter A, Schick F, Claussen CD, Stefan N, Häring H-U, Fritsche A. Pancreatic fat is negatively associated with insulin secretion in individuals with impaired fasting glucose and/or impaired glucose tolerance: a nuclear magnetic resonance study. *Diabetes Metab Res Rev*. 2010;26(3):200–205.
  12. Gaborit B, Abdesselam I, Kober F, Jacquier A, Ronsin O, Emungania O, Lesavre N, Alessi M-C, Martin JC, Bernard M, Dutour A. Ectopic fat storage in the pancreas using <sup>1</sup>H-MRS: importance of diabetic status and modulation with bariatric surgery-induced weight loss. *Int J Obes*. 2015;39(3):480–487.
  13. Wang C-Y, Ou H-Y, Chen M-F, Chang T-C, Chang C-J. Enigmatic ectopic fat: prevalence of nonalcoholic fatty pancreas disease and its associated factors in a Chinese population. *J Am Heart Assoc*. 2014;3(1):e000297.
  14. Ou H-Y, Wang C-Y, Yang Y-C, Chen M-F, Chang C-J. The association between nonalcoholic fatty pancreas disease and diabetes. *PLoS One*. 2013;8(5):e62561.
  15. Ma J, Song Z, Yan F. Detection of hepatic and pancreatic fat infiltration in type II diabetes mellitus patients with IDEAL-Quant using 3.0T MR: comparison with single-voxel proton spectroscopy. *Chin Med J (Engl)*. 2014;127(20):3548–3552.
  16. van der Zijl NJ, Goossens GH, Moors CCM, van Raalte DH, Muskiet MHA, Pouwels PJW, Blaak EE, Diamant M. Ectopic fat storage in the pancreas, liver, and abdominal fat depots: impact on  $\beta$ -cell function in individuals with impaired glucose metabolism. *J Clin Endocrinol Metab*. 2011;96(2):459–467.
  17. Wong VW-S, Wong GL-H, Yeung DK-W, Abrigo JM, Kong AP-K, Chan RS-M, Chim AM-L, Shen J, Ho C-S, Woo J, Chu WC-W, Chan HL-Y. Fatty pancreas, insulin resistance, and  $\beta$ -cell function: a population study using fat-water magnetic resonance imaging. *Am J Gastroenterol*. 2014;109(4):589–597.
  18. Begovatz P, Koliaki C, Weber K, Strassburger K, Nowotny B, Nowotny P, Müsigg K, Bunke J, Pacini G, Szendroedi J, Roden M. Pancreatic adipose tissue infiltration, parenchymal steatosis and beta cell function in humans. *Diabetologia*. 2015;58(7):1646–1655.
  19. Kühn J-P, Berthold F, Mayerle J, Völzke H, Reeder SB, Rathmann W, Lerch MM, Hosten N, Hegenscheid K, Meffert PJ. Pancreatic steatosis demonstrated at MR imaging in the general population: clinical relevance. *Radiology*. 2015;276(1):129–136.
  20. Heber SD, Hetterich H, Lorbeer R, Bayerl C, Machann J, Auweter S, Storz C, Schlett CL, Nikolaou K, Reiser M, Peters A, Bamberg F. Pancreatic fat content by magnetic resonance imaging in subjects with prediabetes, diabetes, and controls from a general population without cardiovascular disease. *PLoS One*. 2017;12(5):e0177154.
  21. Li J, Xie Y, Yuan F, Song B, Tang C. Noninvasive quantification of pancreatic fat in healthy male population using chemical shift magnetic resonance imaging: effect of aging on pancreatic fat content. *Pancreas*. 2011;40(2):295–299.
  22. Livingstone RS, Begovatz P, Kahl S, Nowotny B, Strassburger K, Giani G, Bunke J, Roden M, Hwang J-H. Initial clinical application of modified Dixon with flexible echo times: hepatic and pancreatic fat assessments in comparison with <sup>1</sup>H MRS. *MAGMA*. 2014;27(5):397–405.
  23. Hu HH, Kim H-W, Nayak KS, Goran MI. Comparison of fat-water MRI and single-voxel MRS in the assessment of hepatic and pancreatic fat fractions in humans. *Obesity (Silver Spring)*. 2010;18(4):841–847.
  24. Rottenkolber M, Ferrari U, Holland L, Aertsen S, Kammer NN, Hetterich H, Fugmann M, Banning F, Weise M, Sacco V, Kohn D, Freiboth I, Hutter S, Hasbargen U, Lehmann R, Grallert H, Parhofer KG, Seissler J, Lechner A. The diabetes risk phenotype of young women with recent gestational diabetes. *J Clin Endocrinol Metab*. 2015;100(6):E910–E918.
  25. Metzger BE, Gabbe SG, Persson B, Buchanan TA, Catalano PA, Damm P, Dyer AR, Leiva A, Hod M, Kitzmiller JL, Lowe LP, McIntyre HD, Oats JJ, Omori Y, Schmidt MI; International Association of Diabetes and Pregnancy Study Groups Consensus Panel. International association of diabetes and pregnancy study groups recommendations on the diagnosis and classification of hyperglycemia in pregnancy. *Diabetes Care*. 2010;33(3):676–682.
  26. American Diabetes Association. Standards of medical care in diabetes—2014. *Diabetes Care*. 2014;37(Suppl 1):S14–S80.
  27. Matsuda M, DeFronzo RA. Insulin sensitivity indices obtained from oral glucose tolerance testing: comparison with the euglycemic insulin clamp. *Diabetes Care*. 1999;22(9):1462–1470.
  28. Ahrén B, Pacini G. Importance of quantifying insulin secretion in relation to insulin sensitivity to accurately assess beta cell function in clinical studies. *Eur J Endocrinol*. 2004;150(2):97–104.
  29. Lingvay I, Esser V, Legendre JL, Price AL, Wertz KM, Adams-Huet B, Zhang S, Unger RH, Szczepaniak LS. Noninvasive quantification of pancreatic fat in humans. *J Clin Endocrinol Metab*. 2009;94(10):4070–4076.
  30. Chai J, Liu P, Jin E, Su T, Zhang J, Shi K, Hong XU, Yin J, Yu H. MRI chemical shift imaging of the fat content of the pancreas and liver of patients with type 2 diabetes mellitus. *Exp Ther Med*. 2016;11(2):476–480.
  31. Staaf J, Labmayr V, Paulmichl K, Manell H, Cen J, Ciba I, Dahlbom M, Roomp K, Anderwald C-H, Meissnitzer M, Schneider R, Forslund A, Widhalm K, Bergquist J, Ahlström H, Bergsten P, Weghuber D, Kullberg J. Pancreatic fat is associated with metabolic syndrome and visceral fat but not beta-cell function or body mass index in pediatric obesity. *Pancreas*. 2017;46(3):358–365.
  32. Shimabukuro M, Higa M, Zhou Y-T, Wang M-Y, Newgard CB, Unger RH. Lipoapoptosis in beta-cells of obese prediabetic *falga* rats. Role of serine palmitoyltransferase overexpression. *J Biol Chem*. 1998;273(49):32487–32490.
  33. Hirose H, Lee YH, Inman LR, Nagasawa Y, Johnson JH, Unger RH. Defective fatty acid-mediated  $\beta$ -cell compensation in Zucker diabetic fatty rats. Pathogenic implications for obesity-dependent diabetes. *J Biol Chem*. 1996;271(10):5633–5637.
  34. Milburn JL Jr, Hirose H, Lee YH, Nagasawa Y, Ogawa A, Ohneda M, BeltrandelRio H, Newgard CB, Johnson JH, Unger RH. Pancreatic  $\beta$ -cells in obesity. Evidence for induction of functional, morphologic, and metabolic abnormalities by increased long chain fatty acids. *J Biol Chem*. 1995;270(3):1295–1299.
